# Supplementary material
Source: HighWire-hosted journal article supplement (https://erj.ersjournals.com/content/51/2/1701886)
Supplement: inline-supplementary-material-1 [file inline-supplementary-material-1.pdf]

## Supplementary appendix

**TABLE S1** Inclusion and exclusion criteria

| <b>Inclusion criteria</b> |                                                                                                                                                                                                                                                                                                                                                                                           |
|---------------------------|-------------------------------------------------------------------------------------------------------------------------------------------------------------------------------------------------------------------------------------------------------------------------------------------------------------------------------------------------------------------------------------------|
| 1.                        | Written informed consent prior to initiation of any study-mandated procedure                                                                                                                                                                                                                                                                                                              |
| 2.                        | Males or females $\geq 18$ years of age                                                                                                                                                                                                                                                                                                                                                   |
| 3.                        | Chronic heart failure fulfilling all of the following criteria: <ul style="list-style-type: none"> <li>- Relevant structural heart disease and/or diastolic dysfunction<sup>1</sup></li> <li>- Ejection fraction <math>\geq 30\%</math> measured by echocardiography</li> <li>- NYHA FC II or III</li> </ul>                                                                              |
| 4.                        | PH in WHO group 2 (NICE classification <sup>2</sup> ) with a PAWP $>15$ mmHg, confirmed by any previous right heart catheterisation                                                                                                                                                                                                                                                       |
| 5.                        | Right heart catheterisation within 12 weeks prior to the Screening visit or during the Screening period with the following data: <ul style="list-style-type: none"> <li>- mPAP <math>\geq 25</math> mmHg at rest</li> <li>- PAWP or LVEDP <math>&lt;25</math> mmHg</li> <li>- PVR at rest <math>\geq 240</math> dyn·sec/cm<sup>5</sup></li> <li>- DPG <math>\geq 7</math> mmHg</li> </ul> |
| 6.                        | Optimal treatment of left heart failure with stable dose of oral diuretic(s) (and other standard heart failure treatment, if applicable) for at least 1 week prior to baseline right heart catheterisation and up to Randomisation                                                                                                                                                        |
| 7.                        | 6-minute walk distance $\geq 150$ m at Screening or Randomisation                                                                                                                                                                                                                                                                                                                         |
| 8.                        | For women of child-bearing potential, it was necessary to have a negative pre-treatment serum pregnancy test, agreement to undertake monthly serum pregnancy tests, and agreement to use accepted methods of birth control from Screening to last 30 days after study treatment discontinuation                                                                                           |
| <b>Exclusion criteria</b> |                                                                                                                                                                                                                                                                                                                                                                                           |
| 1.                        | PH associated with significant unrepaired structural valvular heart disease ( <i>i.e.</i> moderate or severe aortic stenosis, aortic insufficiency, mitral stenosis, mitral regurgitation still persisting after fluid control). Repaired valvular heart disease and valvular replacement allowed.                                                                                        |

|                                                                                                                                                                                                                                  |
|----------------------------------------------------------------------------------------------------------------------------------------------------------------------------------------------------------------------------------|
| 2. Evidence of pulmonary oedema                                                                                                                                                                                                  |
| 3. Presence of orthopnoea                                                                                                                                                                                                        |
| 4. Presence of moderate-to-severe peripheral oedema despite optimal diuretic therapy                                                                                                                                             |
| 5. History of pulmonary thromboembolism with segmental defect on ventilation/perfusion scan                                                                                                                                      |
| 6. Systemic hypertension, <i>i.e.</i> SBP >180 mmHg or DBP >100 mmHg                                                                                                                                                             |
| 7. SBP <90 mmHg                                                                                                                                                                                                                  |
| 8. Uncontrolled heart rate from atrial fibrillation (>100 beats per minute)                                                                                                                                                      |
| 9. Clinically known pulmonary veno-occlusive disease                                                                                                                                                                             |
| 10. Untreated obstructive sleep apnoea                                                                                                                                                                                           |
| 11. Unstable coronary artery disease                                                                                                                                                                                             |
| 12. Severe hepatic impairment                                                                                                                                                                                                    |
| 13. Myocardial infarction within 6 months prior to Randomisation                                                                                                                                                                 |
| 14. Obstructive, restrictive, and infiltrative cardiomyopathies, <i>e.g.</i> amyloidosis                                                                                                                                         |
| 15. Severe obstructive lung disease defined as FEV <sub>1</sub> /FVC <0.7 associated with FEV <sub>1</sub> <50% of predicted value after bronchodilator administration                                                           |
| 16. Known severe emphysema, <i>e.g.</i> total lung capacity >120% of predicted value                                                                                                                                             |
| 17. Known moderate-to-severe restrictive lung disease                                                                                                                                                                            |
| 18. PaO <sub>2</sub> <60 mmHg or SpO <sub>2</sub> <90% at room air                                                                                                                                                               |
| 19. Estimated creatinine clearance <30 mL/min                                                                                                                                                                                    |
| 20. AST and/or ALT >3×ULN at Screening                                                                                                                                                                                           |
| 21. Haemoglobin <100 g/L at Screening                                                                                                                                                                                            |
| 22. Pregnancy, or planned to become pregnant or lactating                                                                                                                                                                        |
| 23. Administration of PAH-specific therapy ( <i>i.e.</i> ERAs, prostanoids, PDE-5 inhibitors, guanylate cyclase stimulators) or another investigational drug in the 1-month period prior to baseline right heart catheterisation |
| 24. Treatment with strong cytochrome P-450 3A4 (CYP3A4) inducers, such as rifabutin, rifampin, rifampicin, rifapentin, carbamazepine, phenobarbital, phenytoin, or St John's wort, in the 1-month period prior to Randomisation  |
| 25. Known hypersensitivity to drugs of the same class as the study treatment ( <i>i.e.</i> ERAs), or to any of                                                                                                                   |

|                                                                                                                                                                                                                                            |
|--------------------------------------------------------------------------------------------------------------------------------------------------------------------------------------------------------------------------------------------|
| the study treatment excipients                                                                                                                                                                                                             |
| 26. Any condition that prevented compliance with the protocol or adherence to therapy                                                                                                                                                      |
| 27. Previous right heart catheterisation with severe complications, such as (but not limited to) cardiac arrest, arrhythmia requiring intervention, pulmonary haemorrhage, stroke, thromboembolic event, and pulmonary hypertensive crisis |

ALT, alanine aminotransferase; AST, aspartate aminotransferase; DBP, diastolic blood pressure; DPG, diastolic pressure gradient; ERA, endothelin receptor antagonist; FEV<sub>1</sub>, forced expiratory volume in 1 second; FVC, forced vital capacity; LVEDP, left ventricular end diastolic pressure; mPAP, mean pulmonary arterial pressure; NICE, National Institute for Health and Care Excellence; NYHA FC, New York Heart Association Functional Class; PAH, pulmonary arterial hypertension; PaO<sub>2</sub>, partial pressure of oxygen in arterial blood; PAWP, pulmonary arterial wedge pressure; PDE-5, phosphodiesterase type-5; PH, pulmonary hypertension; PVR, pulmonary vascular resistance; SBP, systolic blood pressure; SpO<sub>2</sub>, saturation of peripheral oxygen; ULN, upper limit of normal; WHO, World Health Organization.

**TABLE S2** Treatment-emergent serious adverse events

| n (%)                                        | Macitentan | Placebo  |
|----------------------------------------------|------------|----------|
|                                              | n=31       | n=32     |
| Patients with $\geq 1$ serious adverse event | 11 (35.5)  | 6 (18.8) |
| Pneumonia                                    | 2 (6.5)    | 0        |
| Cardiac failure acute                        | 1 (3.2)    | 0        |
| Cardiac failure congestive                   | 1 (3.2)    | 1 (3.1)  |
| Cardiorenal syndrome                         | 1 (3.2)    | 0        |
| Chronic respiratory failure                  | 1 (3.2)    | 0        |
| Hypoglycaemia                                | 1 (3.2)    | 0        |
| Jugular vein thrombosis                      | 1 (3.2)    | 0        |
| Left ventricular failure                     | 1 (3.2)    | 0        |
| Mouth haemorrhage                            | 1 (3.2)    | 0        |
| Oedema peripheral                            | 1 (3.2)    | 1 (3.1)  |
| Respiratory failure                          | 1 (3.2)    | 0        |
| Pulmonary mass                               | 1 (3.2)    | 0        |
| Pulmonary oedema                             | 1 (3.2)    | 0        |
| Pulmonary congestion                         | 1 (3.2)    | 0        |
| Respiratory tract infection bacterial        | 1 (3.2)    | 0        |
| Right ventricular failure                    | 1 (3.2)    | 1 (3.1)  |
| Sudden death                                 | 1 (3.2)    | 0        |
| Ventricular tachycardia                      | 1 (3.2)    | 0        |
| Acute kidney injury                          | 0          | 1 (3.1)  |
| Atrial fibrillation                          | 0          | 1 (3.1)  |
| Fall                                         | 0          | 1 (3.1)  |

**TABLE S3** Adverse events leading to study treatment discontinuation

| n (%)                                                           | Macitentan<br>n=31 | Placebo<br>n=32 |
|-----------------------------------------------------------------|--------------------|-----------------|
| Patients with $\geq 1$ adverse event leading to discontinuation | 5 (16.1)           | 0               |
| Dyspnoea                                                        | 1 (3.2)            | 0               |
| Respiratory failure                                             | 1 (3.2)            | 0               |
| Right ventricular failure                                       | 1 (3.2)            | 0               |
| Mouth haemorrhage                                               | 1 (3.2)            | 0               |
| Jugular vein thrombosis                                         | 1 (3.2)            | 0               |

**TABLE S4** Adverse events of special interest

|                                             | Macitentan<br>n=31 | Placebo<br>n=32 |
|---------------------------------------------|--------------------|-----------------|
| <i>Related to oedema and fluid overload</i> |                    |                 |
| Patients with $\geq 1$ adverse event        | 8 (25.8)           | 6 (18.8)        |
| Oedema/peripheral oedema                    | 4 (12.9)           | 4 (12.5)        |
| Fluid retention/overload                    | 3 (9.7)            | 0               |
| Pulmonary congestion/oedema                 | 2 (6.4)            | 0               |
| Pleural effusion                            | 0                  | 2 (6.3)         |
| <i>Related to anaemia</i>                   |                    |                 |
| Patients with $\geq 1$ adverse event        | 4 (12.9)           | 1 (3.1)         |
| Anaemia                                     | 2 (6.5)            | 0               |
| Iron-deficiency anaemia                     | 0                  | 1 (3.1)         |
| Haemoglobin decreased                       | 2 (6.5)            | 0               |

**TABLE S5** Marked abnormalities in laboratory values\*

| Laboratory abnormality, n/N (%)       | Macitentan<br>n=31 | Placebo<br>n=32 |
|---------------------------------------|--------------------|-----------------|
| Haemoglobin                           |                    |                 |
| LL <sup>†</sup> (<100 g/L)            | 5/28 (17.9)        | 2/32 (6.3)      |
| Haematocrit                           |                    |                 |
| HH (>55% for females, >60% for males) | 1/28 (3.6)         | 0/32            |
| Lymphocytes                           |                    |                 |
| LL (<0.8×10 <sup>9</sup> /L)          | 4/28 (14.3)        | 1/32 (3.1)      |
| LLL (<0.5×10 <sup>9</sup> /L)         | 2/28 (7.1)         | 0/32            |
| HH (<4.0×10 <sup>9</sup> /L)          | 0/28               | 1/32 (3.1)      |
| Platelets                             |                    |                 |
| LL (<75×10 <sup>9</sup> /L)           | 1/28 (3.6)         | 0/32            |
| Alkaline phosphatase                  |                    |                 |
| HH (2.5×ULN)                          | 0/28               | 1/32 (3.1)      |
| Bilirubin                             |                    |                 |
| HH (>2×ULN)                           | 2/28 (7.1)         | 0/32            |
| Creatinine <sup>‡</sup>               |                    |                 |
| HH (>1.5×baseline or 1.5×ULN)         | 8/29 (27.6)        | 5/32 (15.6)     |
| Blood urea nitrogen                   |                    |                 |
| HH (>2.5×ULN)                         | 4/29 (13.8)        | 3/32 (9.4)      |
| Urate                                 |                    |                 |
| HH (>0.59 mmol/L)                     | 1/28 (3.6)         | 2/32 (6.3)      |
| HHH (>0.72 mmol/L)                    | 1/28 (3.6)         | 0/32            |
| Glucose                               |                    |                 |
| LL (<3.0 mmol/L)                      | 0/29               | 1/32 (3.1)      |
| HH (>8.9 mmol/L)                      | 4/29 (13.8)        | 3/32 (9.4)      |
| HHH (>13.9 mmol/L)                    | 1/29 (3.4)         | 1/32 (3.1)      |
| Sodium                                |                    |                 |

|                    |             |            |
|--------------------|-------------|------------|
| LLL (<130 mmol/L)  | 1/29 (3.4)  | 1/32 (3.1) |
| Potassium          |             |            |
| LL (<3.2 mmol/L)   | 2/29 (6.9)  | 1/32 (3.1) |
| LLL (<3.0 mmol/L)  | 1/29 (3.4)  | 0/32       |
| HH (>5.5 mmol/L)   | 5/29 (17.2) | 1/32 (3.1) |
| HHH (>6.0 mmol/L)  | 2/29 (6.9)  | 0/32       |
| Magnesium          |             |            |
| HHH (>1.23 mmol/L) | 1/28 (3.6)  | 1/32 (3.1) |

HH/HHH, marked high abnormality; LL/LLL, marked low abnormality; n, number of patients; N, number of patients with available data; ULN, upper limit of normal. \*Frequencies represent the number of patients with the defined abnormality reported at least once; <sup>†</sup>No patients reported haemoglobin values <80 g/L. In four of the five macitentan-treated patients, the magnitude of decrease from baseline was  $\geq 20$  g/L. In all cases, haemoglobin levels returned to normal or to near baseline levels by end of study. In two of the macitentan-treated patients, the decrease from baseline was  $\geq 50$  g/L. In both cases, haemoglobin returned to a value close to normal by end of study; <sup>‡</sup>Most patients with marked abnormalities in creatinine had elevated creatinine levels at baseline.



**TABLE S6** Change in haemodynamic parameters from baseline to Week 12

| Parameter, unit              | Macitentan |               |               |                          | Placebo |               |               |                          | Treatment effect at                            |
|------------------------------|------------|---------------|---------------|--------------------------|---------|---------------|---------------|--------------------------|------------------------------------------------|
|                              | n          | Baseline      | Week 12       | Change                   | n       | Baseline      | Week 12       | Change                   | Week 12                                        |
|                              |            | Mean (SD)     |               | Geometric mean (95% CL)* |         | Mean (SD)     |               | Geometric mean (95% CL)* | Ratio of geometric means (95% CL) <sup>†</sup> |
| PVR, dyn·sec/cm <sup>5</sup> | 20         | 525.5 (270.9) | 357.2 (195.0) | 66.3 (56.2–78.3)         | 24      | 521.4 (233.9) | 438.7 (255.4) | 71.2 (51.4–98.8)         | 0.93 (0.64–1.36)                               |
| Parameter, unit              | Macitentan |               |               |                          | Placebo |               |               |                          | Treatment effect at                            |
|                              | n          | Baseline      | Week 12       | Change                   | n       | Baseline      | Week 12       | Change                   | Week 12                                        |
|                              |            | Mean (SD)     |               |                          |         | Mean (SD)     |               |                          | Mean absolute change from baseline (95% CL)    |

|                                         |    |               |               |                |    |               |               |               |                     |
|-----------------------------------------|----|---------------|---------------|----------------|----|---------------|---------------|---------------|---------------------|
| mPAP, mmHg                              | 21 | 44.6 (8.7)    | 41.1 (10.7)   | -3.5 (5.7)     | 25 | 45.9 (10.2)   | 42.1 (11.2)   | -3.8 (9.1)    | 0.3 (-4.3–4.9)      |
| mRAP, mmHg                              | 21 | 12.1 (4.6)    | 11.2 (5.7)    | -0.9 (5.7)     | 25 | 13.0 (4.7)    | 11.3 (5.2)    | -1.6 (4.0)    | 0.7 (-2.2–3.6)      |
| PAWP, mmHg                              | 20 | 19.1 (3.6)    | 19.9 (7.0)    | 0.8 (6.5)      | 24 | 19.7 (3.6)    | 20.8 (7.0)    | 1.1 (6.5)     | -0.3 (-4.2–3.7)     |
| TPR, dyn·sec/cm <sup>5</sup>            | 21 | 889.7 (409.5) | 671.7 (285.3) | -218.0 (264.7) | 25 | 882.9 (368.6) | 827.1 (361.0) | -55.8 (258.0) | -162.2 (-318.0–6.5) |
| Cardiac index,<br>L/min/m <sup>2</sup>  | 20 | 2.3 (0.6)     | 2.7 (0.7)     | 0.4 (0.5)      | 24 | 2.3 (0.6)     | 2.3 (0.6)     | -0.0 (0.5)    | 0.4 (0.1–0.7)       |
| Cardiac output<br>(L/min)               | 21 | 4.5 (1.3)     | 5.3 (1.4)     | 0.8 (0.9)      | 25 | 4.5 (1.2)     | 4.5 (1.3)     | -0.0 (0.8)    | 0.8 (0.3–1.4)       |
| TPG, mmHg                               | 20 | 26.0 (7.7)    | 21.6 (8.5)    | -4.4 (5.3)     | 24 | 26.9 (7.5)    | 21.8 (10.0)   | -5.0 (8.6)    | 0.7 (-3.7–5.1)      |
| DPG, mmHg                               | 20 | 11.8 (5.9)    | 7.0 (6.1)     | -4.8 (5.3)     | 24 | 11.4 (4.4)    | 7.0 (7.9)     | -4.3 (7.6)    | -0.4 (-4.5–.6)      |
| Mixed venous<br>oxygen saturation,<br>% | 17 | 65.8 (8.4)    | 67.4 (7.4)    | 1.6 (5.2)      | 16 | 61.3 (8.2)    | 63.3 (8.2)    | 2.0 (6.5)     | -0.4 (-4.6–3.8)     |

CL: confidence limit; DPG: diastolic pulmonary gradient; mPAP: mean pulmonary arterial pressure; mRAP: mean right atrial pressure; PAWP: pulmonary arterial wedge pressure; PVR: pulmonary vascular resistance; SD: standard deviation; TPG: transpulmonary pressure gradient; TPR: total peripheral resistance. \*Geometric mean (95% CL) of percent ratio Week 12/baseline; †Ratio of geometric means (macitentan/placebo).

**TABLE S7** Change in echocardiographic parameters from baseline to Week 12

|                                                                     | Macitentan |             |             |              | Placebo   |             |             |              | Treatment effect at<br>Week 12<br><br>Mean absolute change from<br>baseline (95% CLs) |
|---------------------------------------------------------------------|------------|-------------|-------------|--------------|-----------|-------------|-------------|--------------|---------------------------------------------------------------------------------------|
|                                                                     | n          | Baseline    | Week 12     | Change       | n         | Baseline    | Week 12     | Change       |                                                                                       |
| Parameter, unit                                                     | Mean (SD)  |             |             |              | Mean (SD) |             |             |              |                                                                                       |
| E/e' (lateral), ratio                                               | 15         | 10.7 (4.1)  | 11.6 (3.8)  | 0.91 (2.9)   | 19        | 13.2 (7.9)  | 11.4 (5.1)  | -1.78 (5.1)  | 2.69 (-0.32–5.70)                                                                     |
| TAPSE, cm                                                           | 21         | 1.6 (0.5)   | 1.8 (0.6)   | 0.16 (0.6)   | 21        | 1.6 (0.6)   | 1.6 (0.5)   | -0.02 (0.6)  | 0.18 (-0.17–0.54)                                                                     |
| Right ventricle fractional<br>area change, %                        | 23         | 40.0 (12.1) | 37.4 (10.0) | -2.57 (14.7) | 21        | 37.5 (10.9) | 38.0 (9.7)  | 0.41 (7.3)   | -2.98 (-10.16–4.19)                                                                   |
| Right ventricular outflow<br>tract acceleration time,<br>msec       | 23         | 83.7 (17.2) | 80.3 (23.8) | -3.48 (30.0) | 25        | 91.0 (18.4) | 88.5 (28.9) | -2.52 (26.0) | -0.96 (-17.23–15.32)                                                                  |
| Right ventricular: left<br>ventricular diastolic<br>dimension ratio | 23         | 0.9 (0.3)   | 0.9 (0.2)   | -0.08 (0.2)  | 21        | 1.1 (0.2)   | 1.1 (0.2)   | -0.01 (0.2)  | -0.08 (-0.20–0.05)                                                                    |

|                                                                |    |           |           |            |    |           |           |            |                   |
|----------------------------------------------------------------|----|-----------|-----------|------------|----|-----------|-----------|------------|-------------------|
| Right ventricular: left<br>ventricular diastolic area<br>ratio | 19 | 0.8 (0.2) | 0.8 (0.3) | 0.03 (0.2) | 20 | 0.8 (0.3) | 0.8 (0.4) | 0.02 (0.3) | 0.00 (-0.15–0.16) |
|----------------------------------------------------------------|----|-----------|-----------|------------|----|-----------|-----------|------------|-------------------|

CL: confidence limits; SD: standard deviation; TAPSE: tricuspid annular plane systolic excursion.

**TABLE S8** Sensitivity analyses: Change in haemodynamic parameters from baseline to Week 12 after applying imputation rules for missing data

|                              | Macitentan<br>n=31 |                  |                                | Placebo<br>n=32 |               |                                |                                                   |
|------------------------------|--------------------|------------------|--------------------------------|-----------------|---------------|--------------------------------|---------------------------------------------------|
|                              | Baseline           | Week 12          | Change                         | Baseline        | Week 12       | Change                         | Treatment effect at<br>Week 12                    |
| Parameter, unit              | Mean (SD)          |                  | Geometric<br>mean<br>(95% CL)* | Mean (SD)       |               | Geometric<br>mean<br>(95% CL)* | Ratio of geometric<br>means (95% CL) <sup>†</sup> |
| PVR, dyn·sec/cm <sup>5</sup> | 491.2 (235.5)      | 388.7<br>(183.3) | 77.7 (68.2–88.6)               | 549.3 (239.6)   | 487.3 (264.8) | 77.5 (60.6–99.2)               | 1.00 (0.76–1.32)                                  |
|                              | Baseline           | Week 12          | Change                         | Baseline        | Week 12       | Change                         | Treatment effect at<br>Week 12                    |
|                              | Mean (SD)          |                  | Absolute mean<br>(SD)          | Mean (SD)       |               | Absolute mean<br>(SD)          | Mean absolute<br>change from<br>baseline (95% CL) |

|                                        |               |                  |                |               |               |               |                      |
|----------------------------------------|---------------|------------------|----------------|---------------|---------------|---------------|----------------------|
| mPAP, mmHg                             | 46.4 (8.5)    | 45.3 (12.2)      | -1.2 (6.4)     | 47.4 (9.9)    | 44.4 (11.2)   | -3.0 (8.2)    | 1.8 (-1.9–5.5)       |
| mRAP, mmHg                             | 13.2 (4.6)    | 14.2 (8.0)       | 1.1 (6.7)      | 13.3 (4.8)    | 12.1 (5.3)    | -1.3 (3.6)    | 2.3 (-0.4–5.0)       |
| PAWP, mmHg                             | 19.5 (3.3)    | 21.9 (7.9)       | 2.5 (7.2)      | 20.1 (3.9)    | 20.9 (6.5)    | 0.8 (5.6)     | 1.6 (-1.6–4.9)       |
| TPR, dyn·sec/cm <sup>5</sup>           | 844.5 (362.2) | 695.8<br>(265.6) | -148.7 (239.1) | 948.9 (365.0) | 905.3 (367.9) | -43.6 (228.2) | -105.2 (-222.9–12.6) |
| Cardiac index,<br>L/min/m <sup>2</sup> | 2.5 (0.7)     | 2.7 (0.7)        | 0.2 (0.5)      | 2.2 (0.6)     | 2.2 (0.6)     | -0.03 (0.4)   | 0.21 (-0.01–0.44)    |
| Cardiac output<br>(L/min)              | 4.9 (1.5)     | 5.4 (1.4)        | 0.5 (0.9)      | 4.3 (1.1)     | 4.3 (1.2)     | -0.02 (0.7)   | 0.52 (0.11–0.93)     |
| TPG, mmHg                              | 26.9 (7.5)    | 26.0 (11.9)      | -1.0 (7.6)     | 27.3 (7.7)    | 23.6 (10.0)   | -3.8 (7.7)    | 2.8 (-1.0–6.7)       |
| DPG, mmHg                              | 11.3 (6.1)    | 10.0 (10.3)      | -1.3 (8.0)     | 11.1 (5.6)    | 7.8 (8.1)     | -3.3 (6.8)    | 2.0 (-1.8–5.7)       |
| Mixed venous oxygen<br>saturation, %   | 67.7 (8.0)    | 67.5 (6.7)       | -0.2 (5.7)     | 58.5(9.0)     | 59.9 (9.5)    | 1.4 (5.5)     | -1.6 (-4.8–1.6)      |

CL: confidence limits; DPG: diastolic pulmonary gradient; mPAP: mean pulmonary arterial pressure; mRAP: mean right atrial pressure; PAWP: pulmonary arterial wedge pressure; PVR: pulmonary vascular resistance; SD: standard deviation; TPG: transpulmonary pressure gradient; TPR: total peripheral resistance. \*Geometric mean (95% CL) of percent ratio Week 12/baseline; †Ratio of geometric means (macitentan/placebo). Imputation rules for missing data at Week 12: last observation carried forward for patients still alive and not hospitalised; for patients who died or were hospitalised for heart failure, the worst value was imputed.



**MELODY-1 study investigators**

The Macitentan in subjects with combined prE- and post-capillary pulmOnary hypertension due to left ventricular DYsfunction (MELODY) Investigators are as follows: Austria – D. Bonderman, R. Steringer-Mascherbauer; Belgium – M. Delcroix, J.L. Vachiéry; Canada – J. Swiston; Germany – S. Rosenkranz, J. Behr, M. Rosenberg; Czech Republic – P. Jansa, J. Spinar, M. Hutyra, H. Al-Hiti; France – F. Bauer; Israel – A. Yochai, N. Berkman, M. Segel, G. Fink; Italy – G. Sinagra; Spain – F. Pérez Villa, M.A. Gomez Sanchez, E. Domingo Ribas, J.M. Arizon del Prado; Switzerland – M. Schwerzmann, P. Yerly; USA – J.W. McConnell, S. Joseph, H.W. Farber, G. Ashrith, P.J. Engel.
